# Supplementary figures and images for: Arf6-mediated macropinocytosis-enhanced suicide gene therapy of C16TAB-condensed Tat/pDNA nanoparticles in ovarian cancer
Source: Royal Society of Chemistry journal article supplement (doi:10.1039/d1nr03974a), 2021-01-01

**Fig2A**

1h

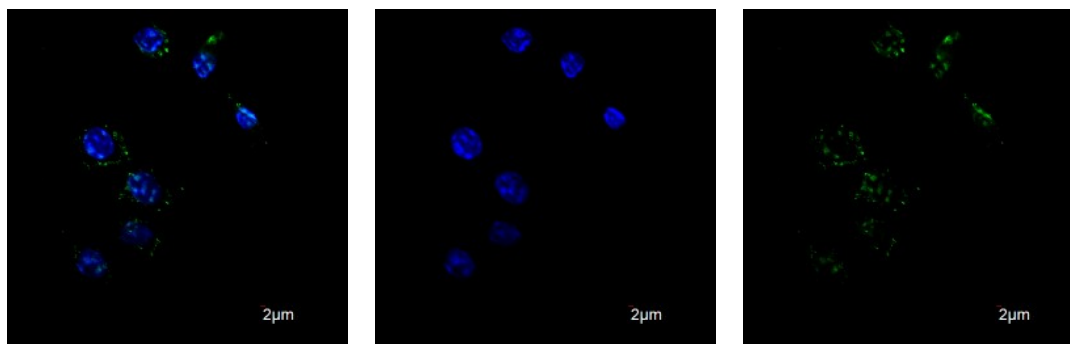

2h

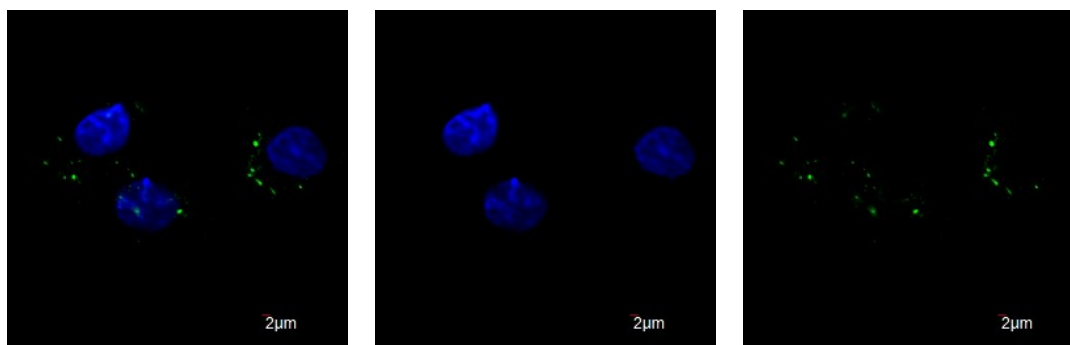

3h

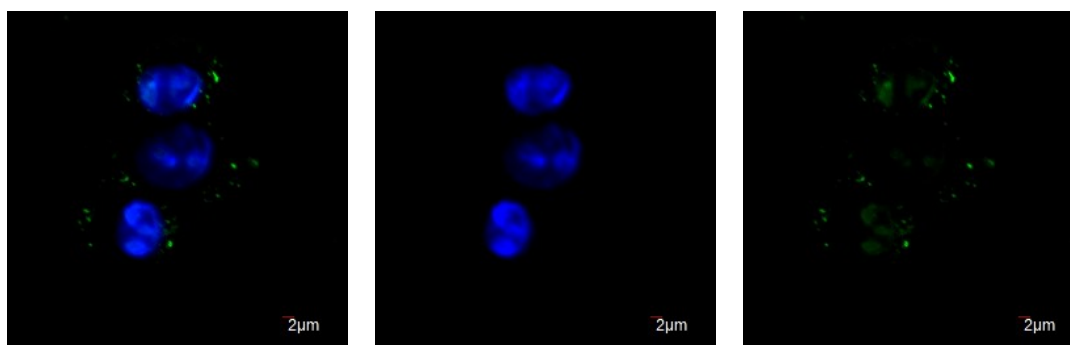

**Fig2B**

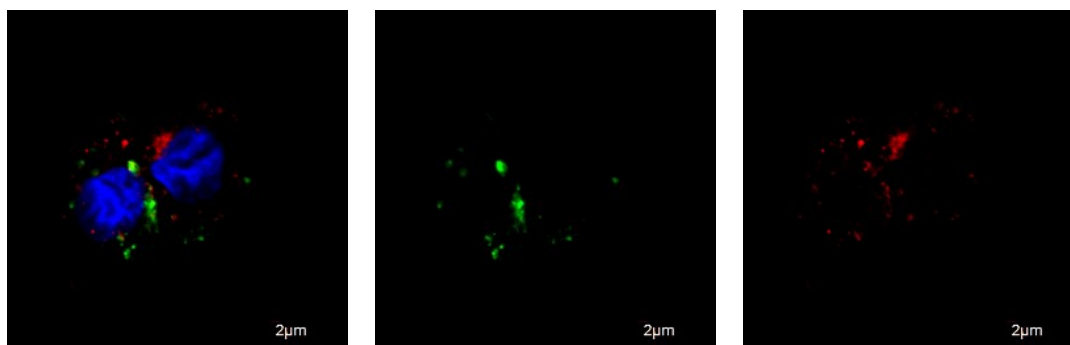

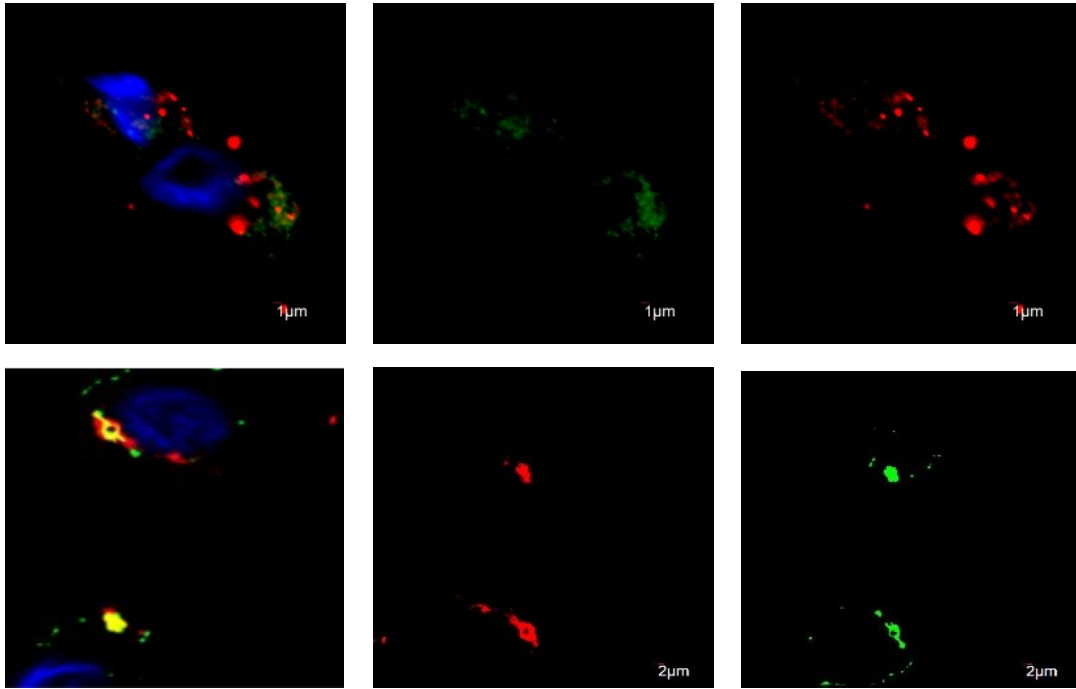

**Fig2C**

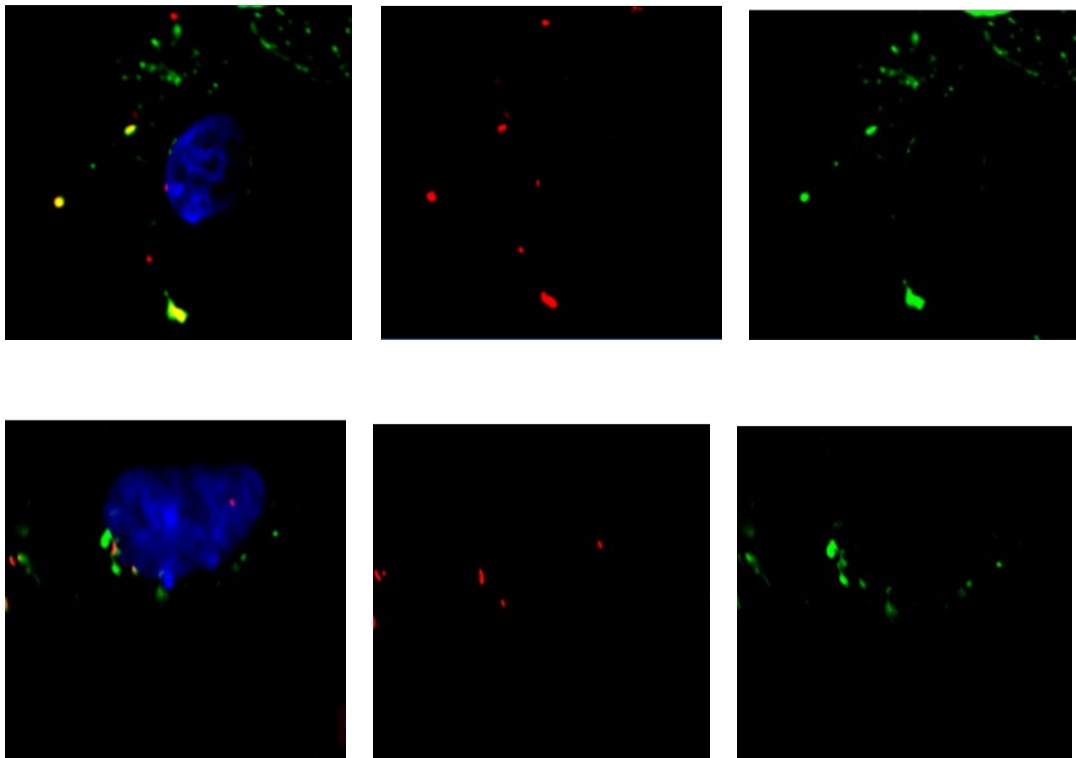

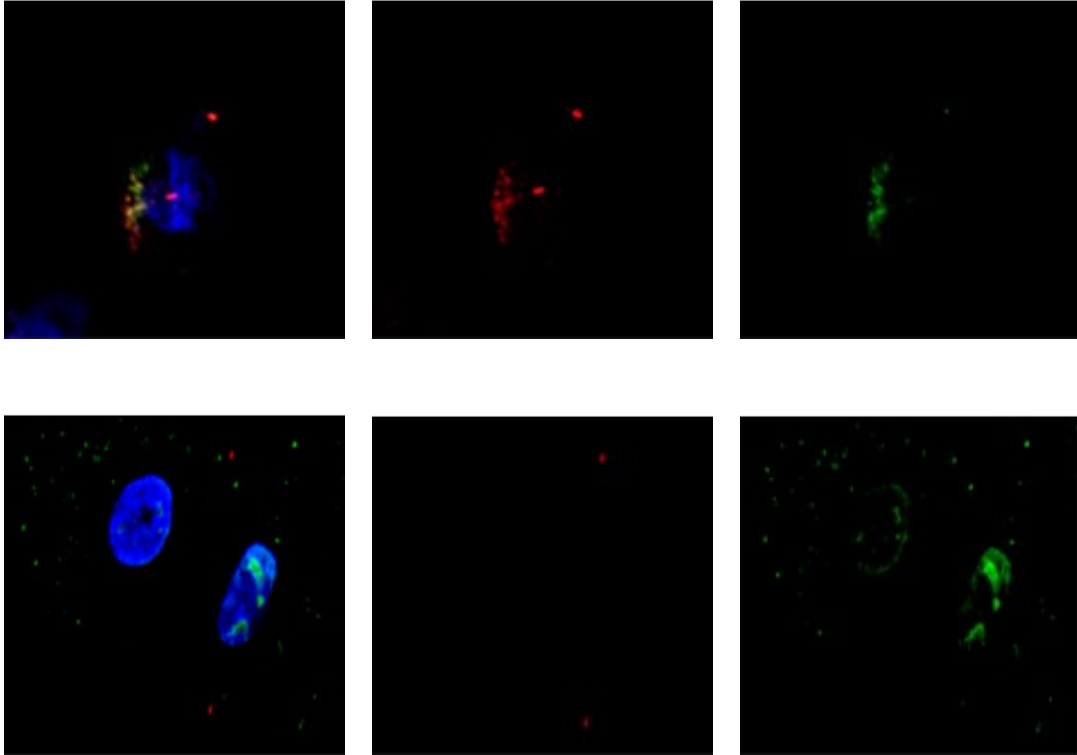

**Fig3D**

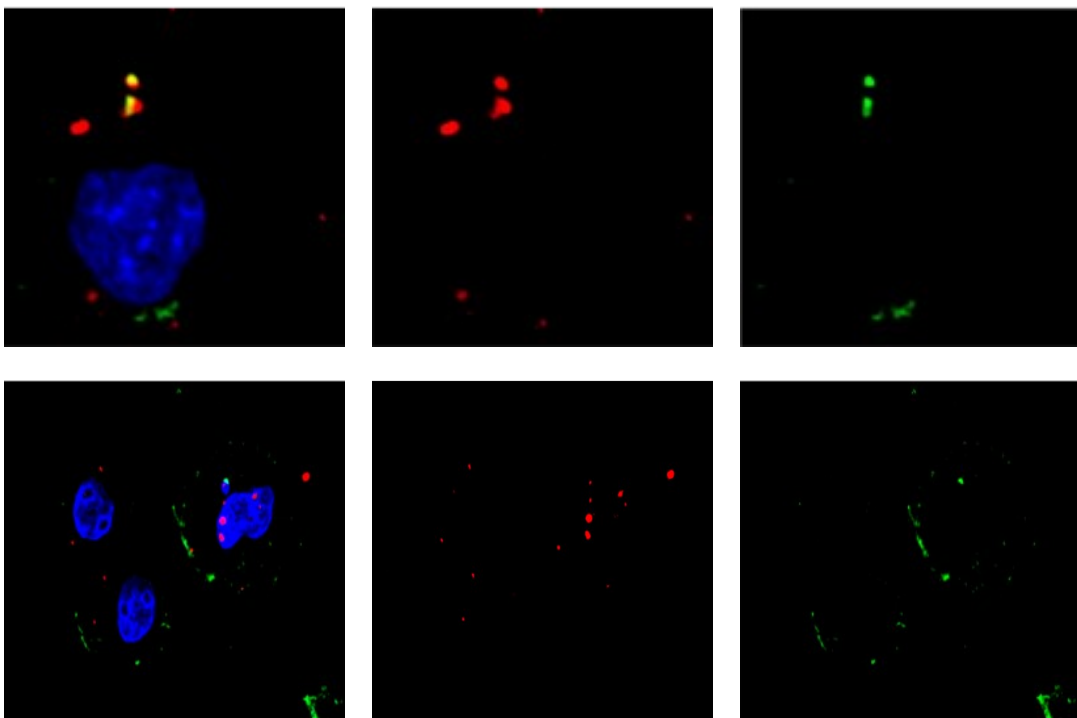

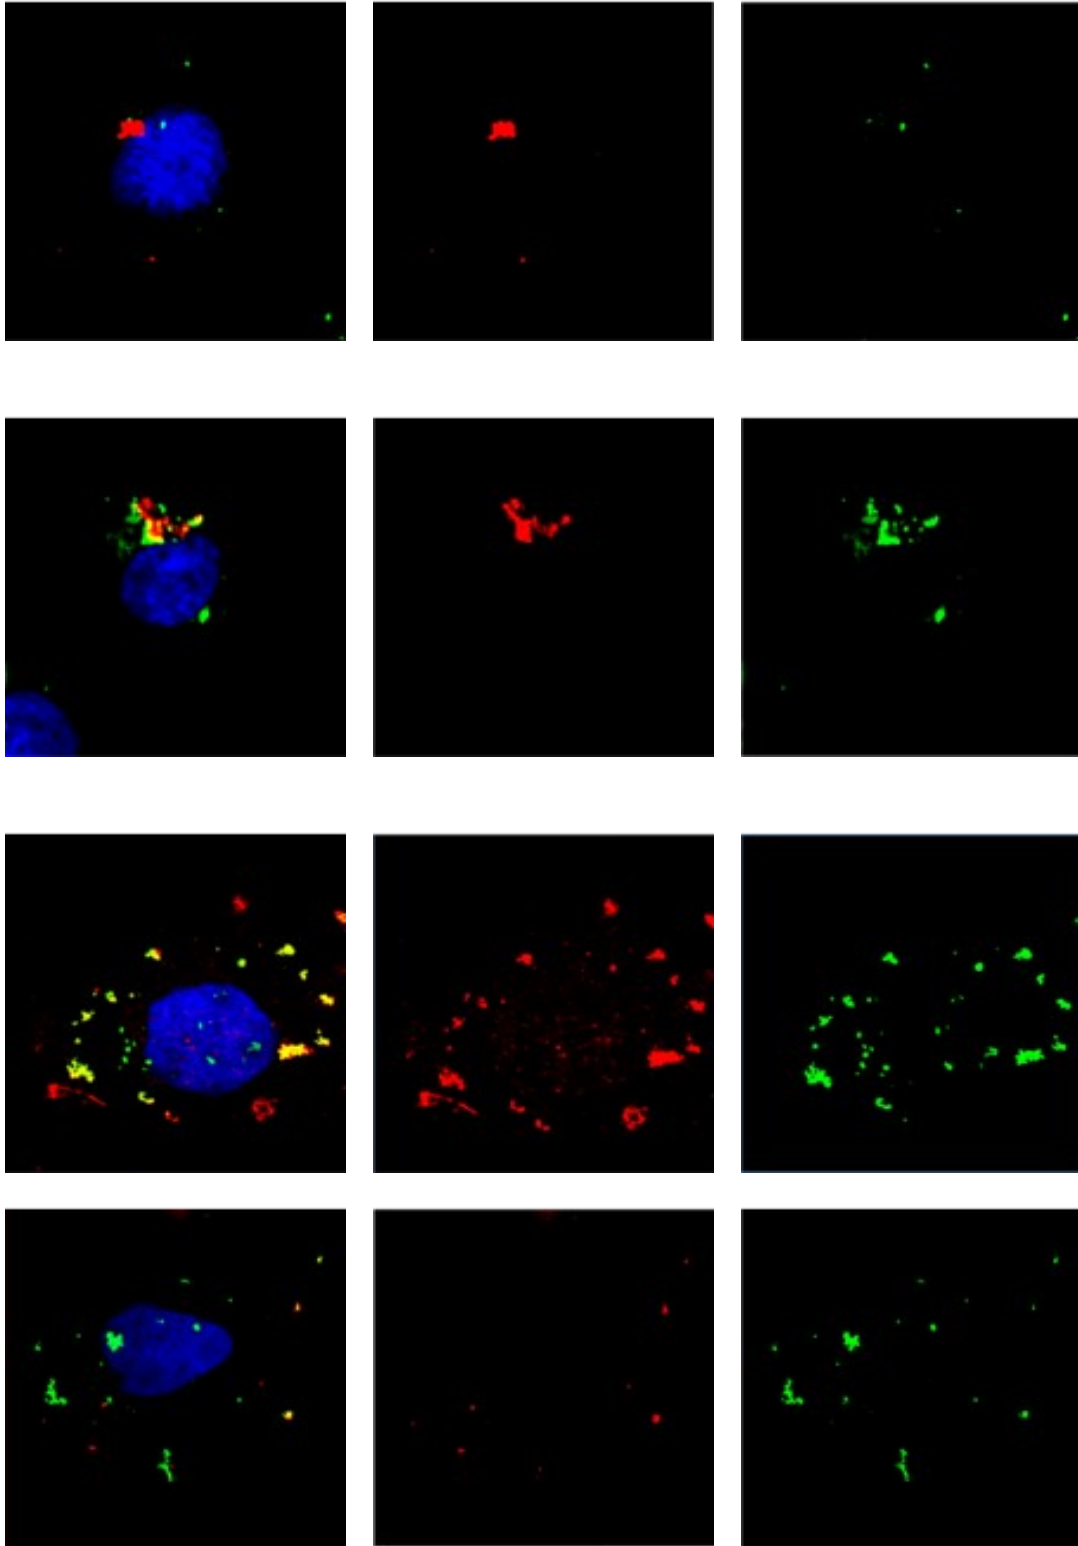

Fig4E

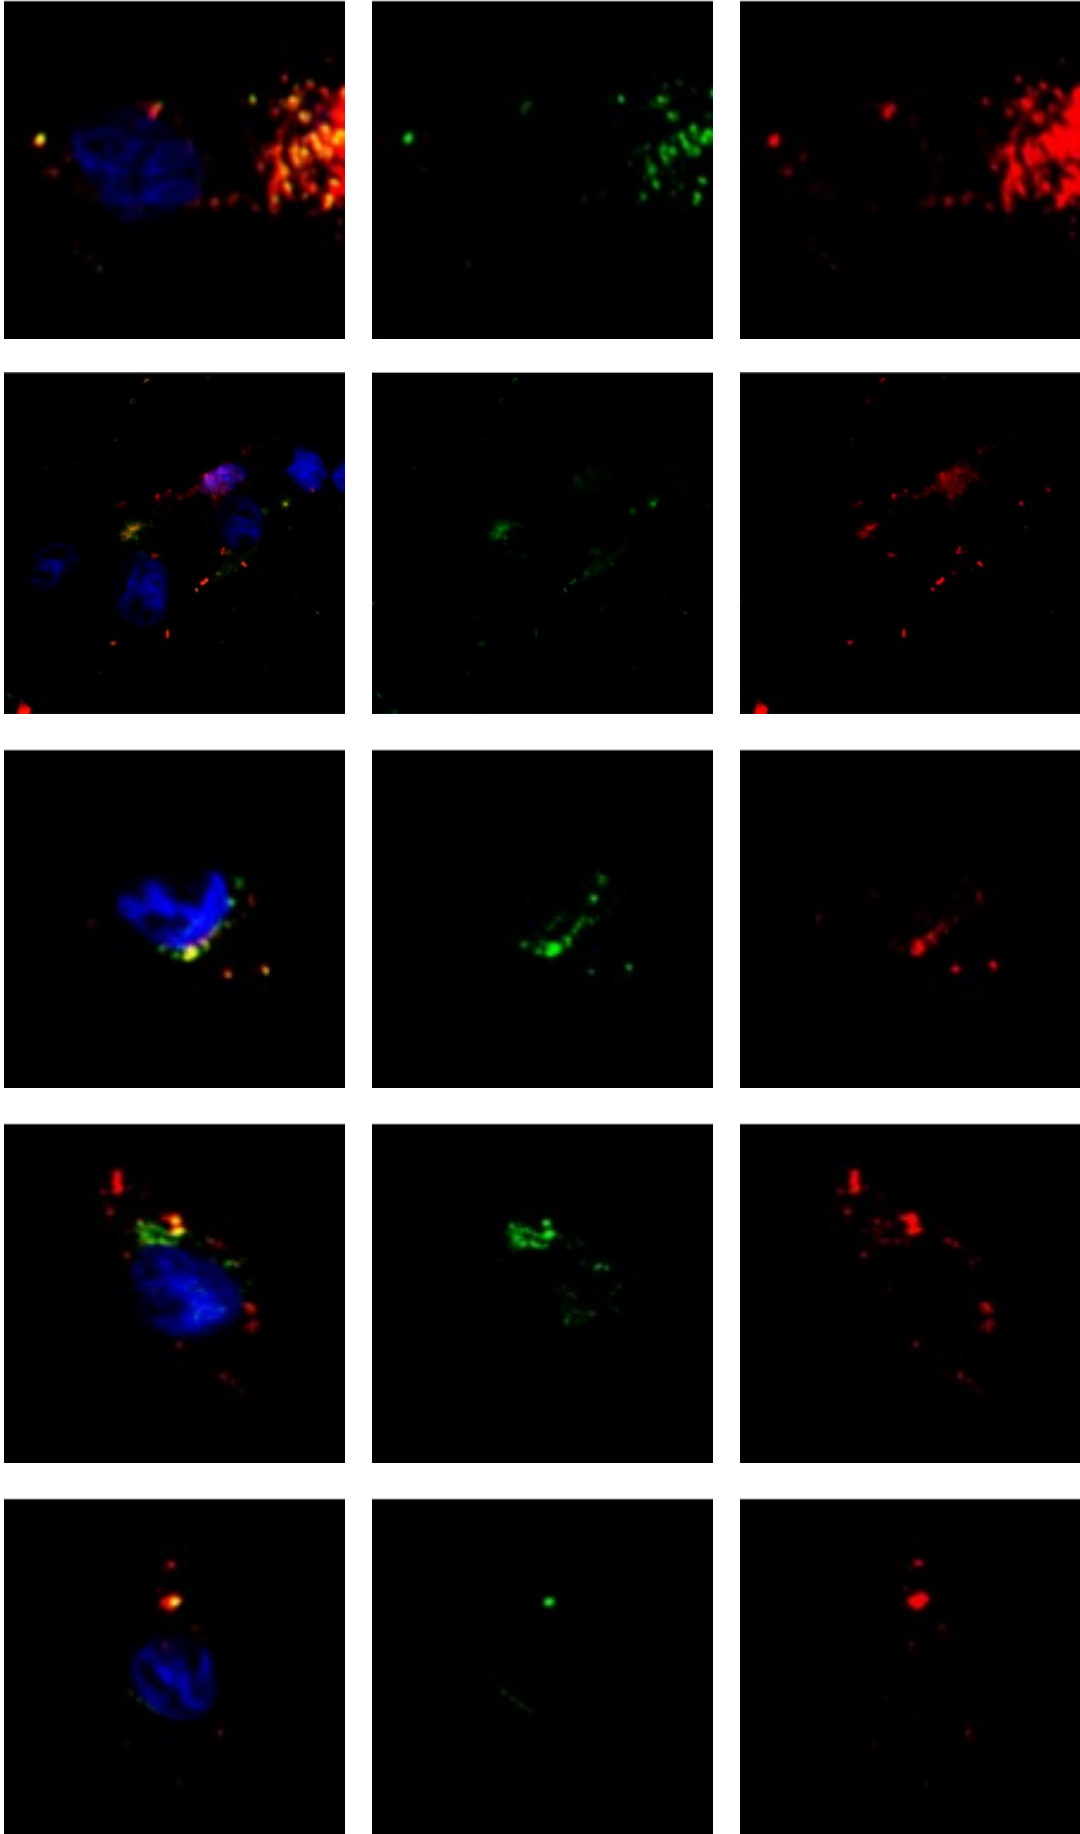

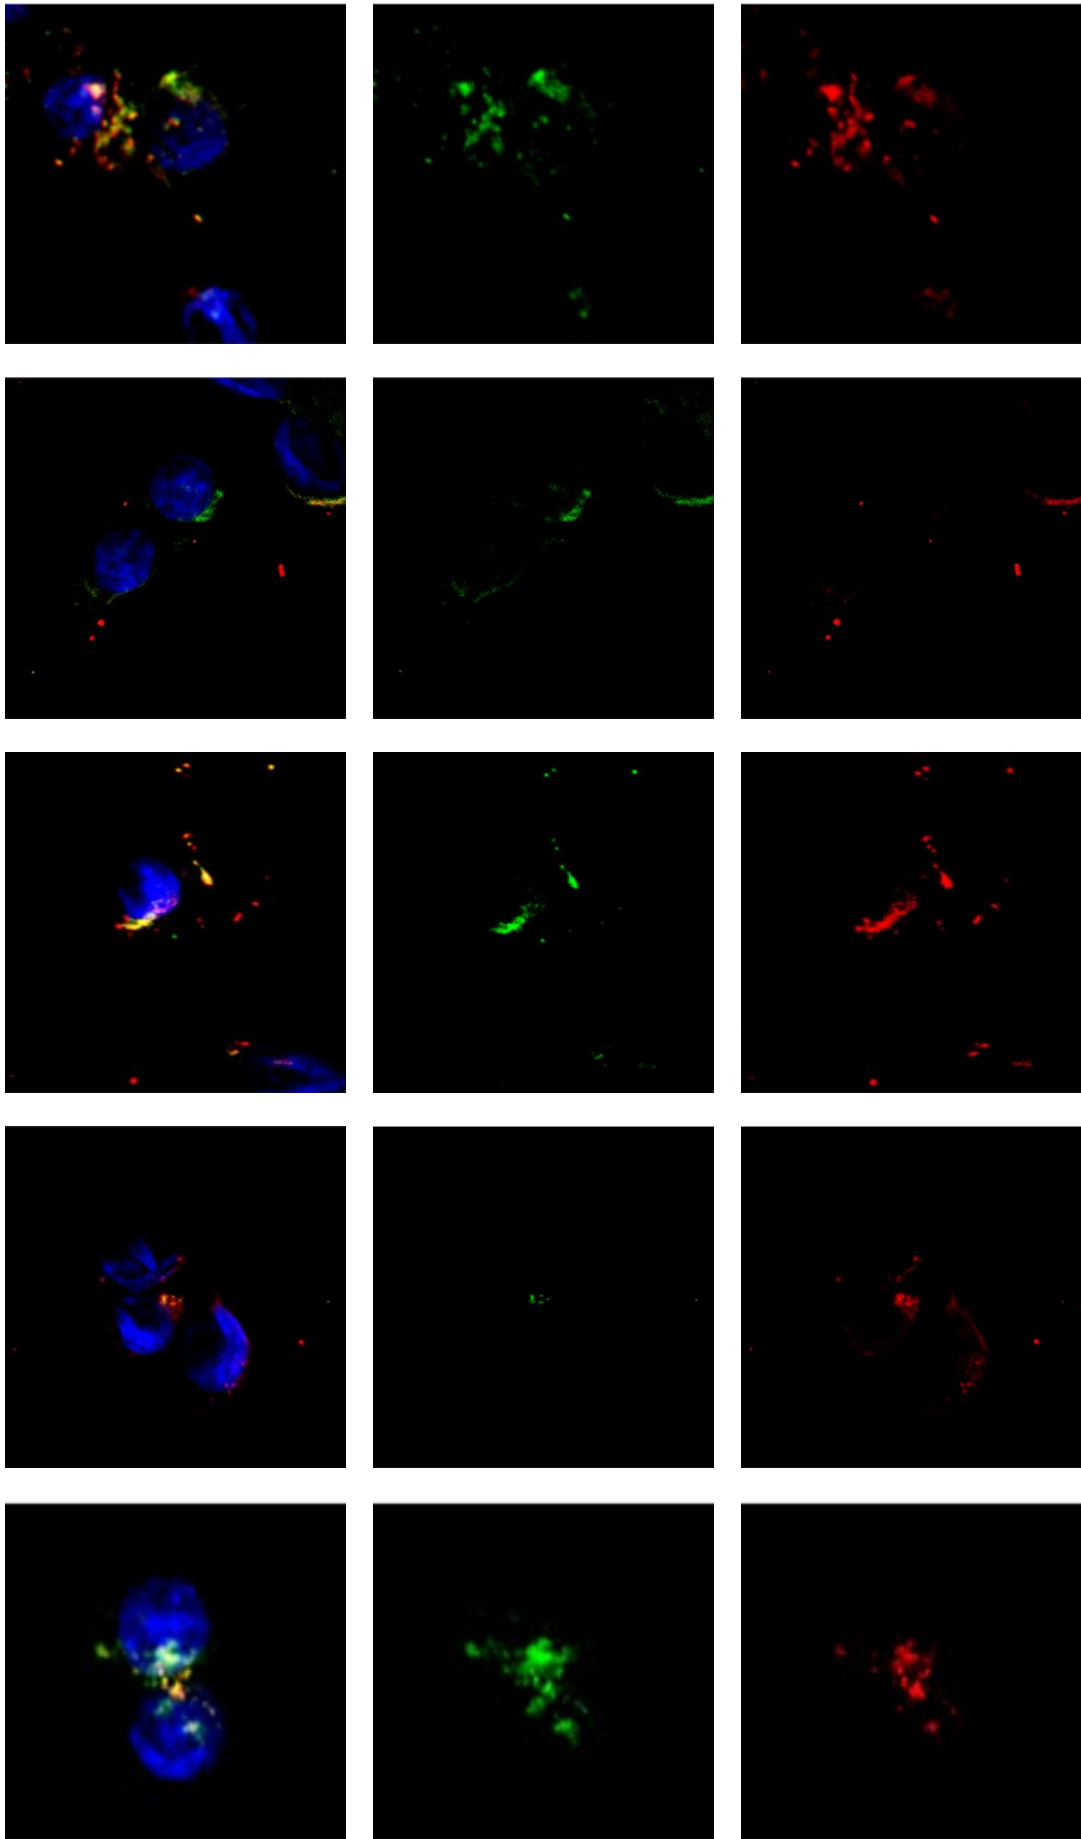

Supplement: d1nr03974a1.pdf [file d1nr03974a1.pdf]
